# Supplementary material
Source: MDPI journal article supplement (https://www.mdpi.com/2073-4433/12/9/1118)
Supplement: s1 [file s1]

# Supplementary Materials:

Lingting Lu <sup>1</sup>, Mingqiang Huang <sup>1,\*</sup>, Xin Lin <sup>1</sup>, Wei Zhang <sup>1</sup>, Weixiong Zhao <sup>2</sup>, Changjin Hu <sup>2</sup>, Xuejun Gu <sup>2</sup>, and Weijun Zhang <sup>2,\*</sup>

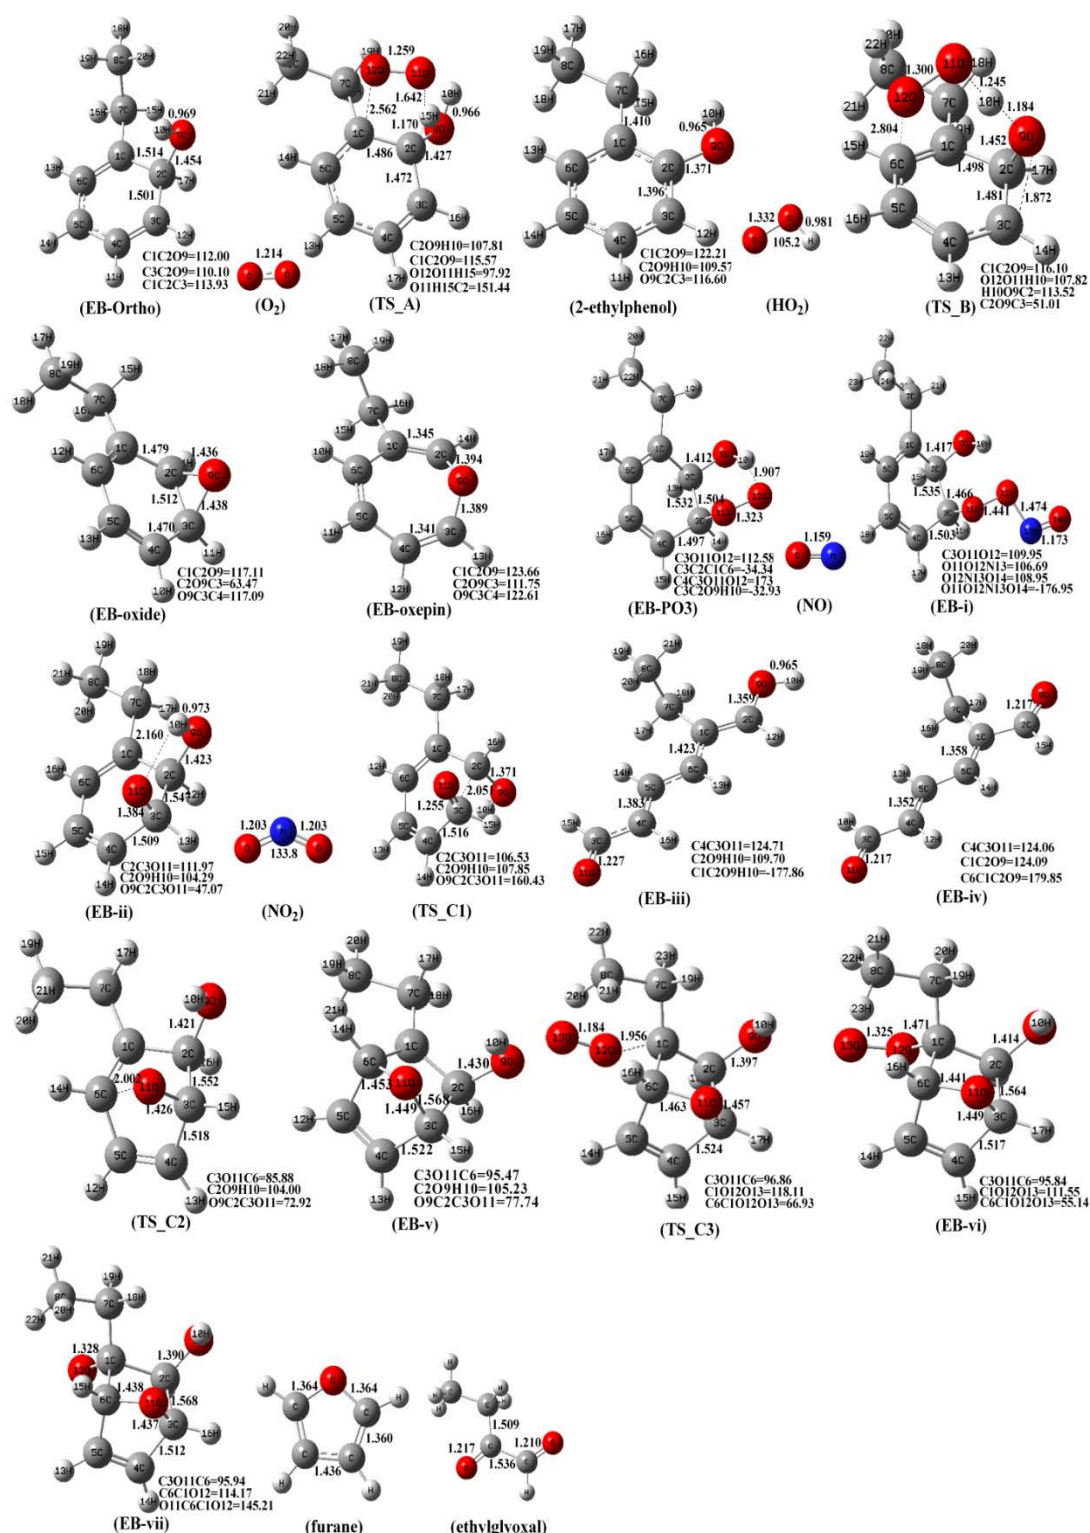

**Figure S1.** Optimized geometries of various species of EB-Ortho react with O<sub>2</sub> at BHandHLYP/6-311++ G(d,p) level (Bond length: Å, Bond angle: (°)).

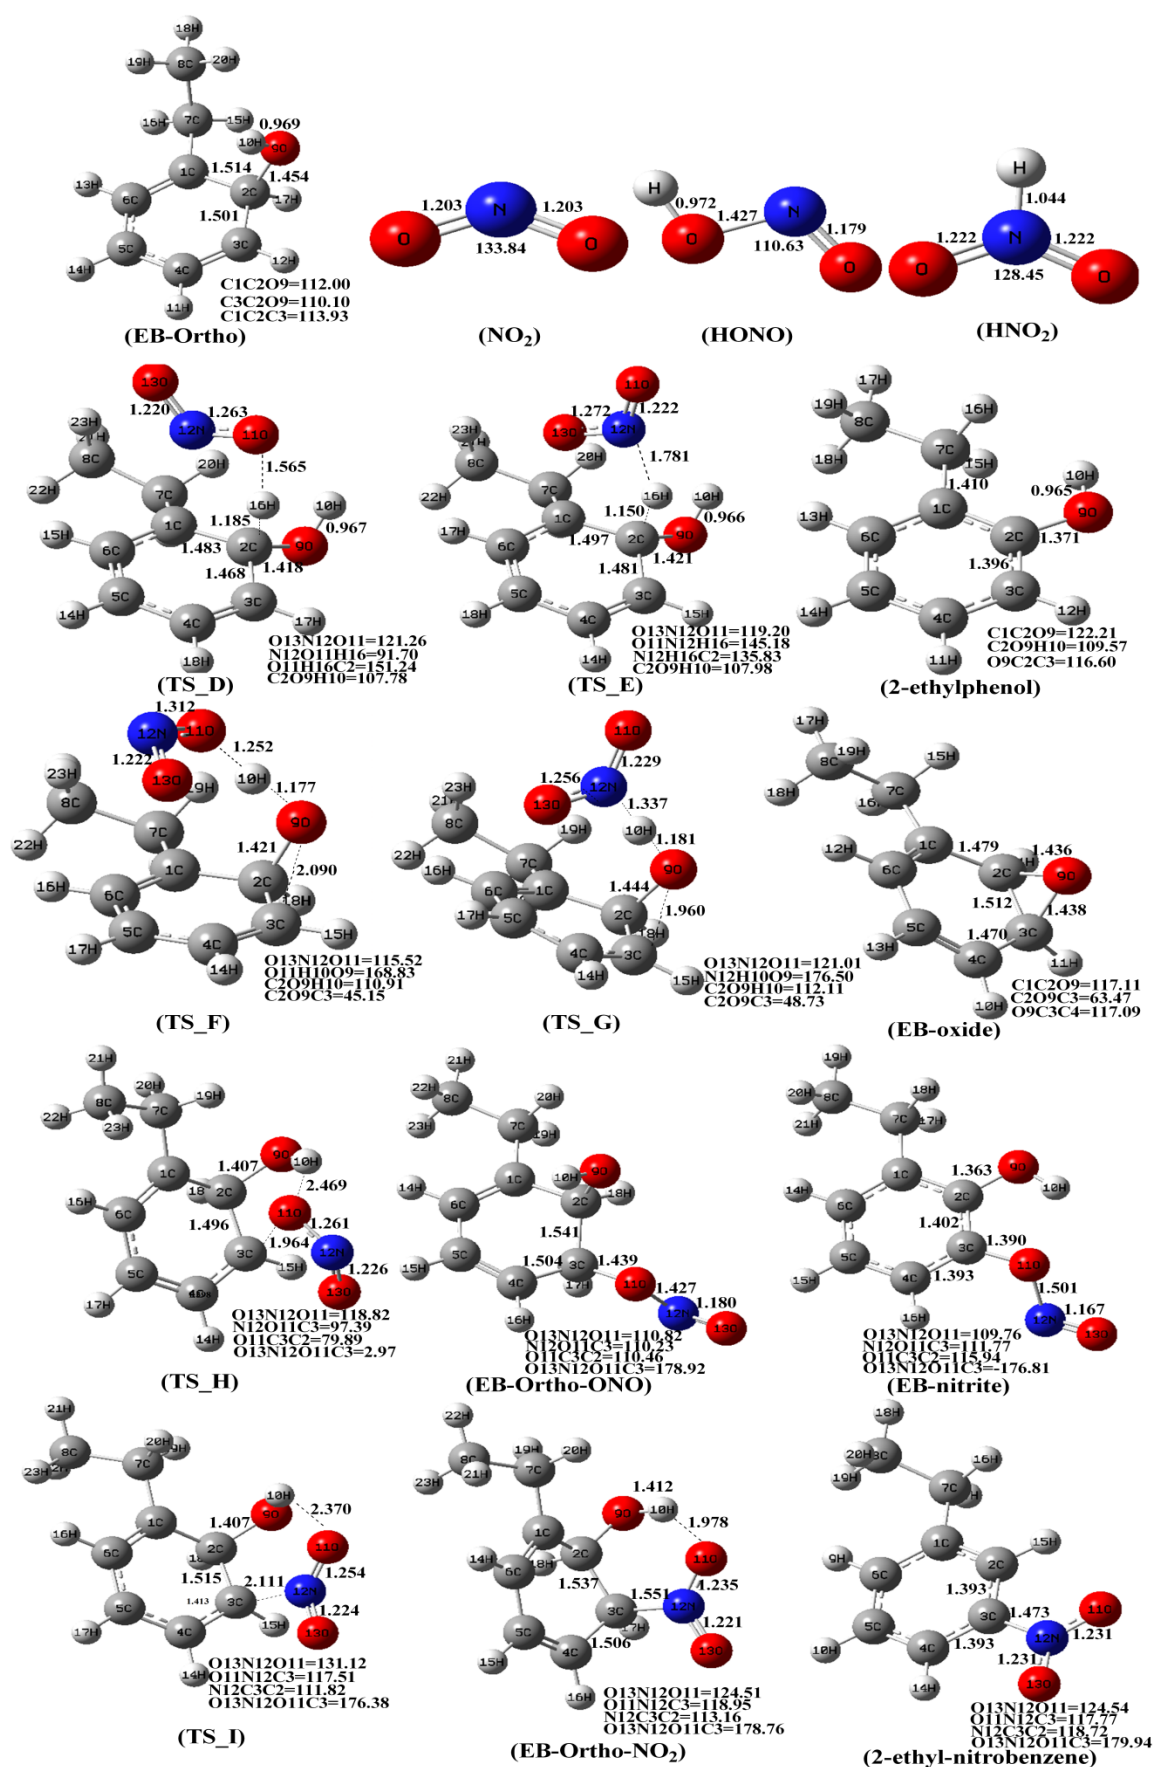

**Figure S2.** Optimized geometries of various species of EB-Ortho react with NO<sub>2</sub> at BHandHLYP/ 6-311++ G(d,p) level (Bond length: Å, Bond angle: (°)).
